# Supplementary material
Source: PubMed Central journal article supplement (PMC8723918)
Supplement: NIHMS1720659-supplement-1.pdf [file NIHMS1720659-supplement-1.pdf]

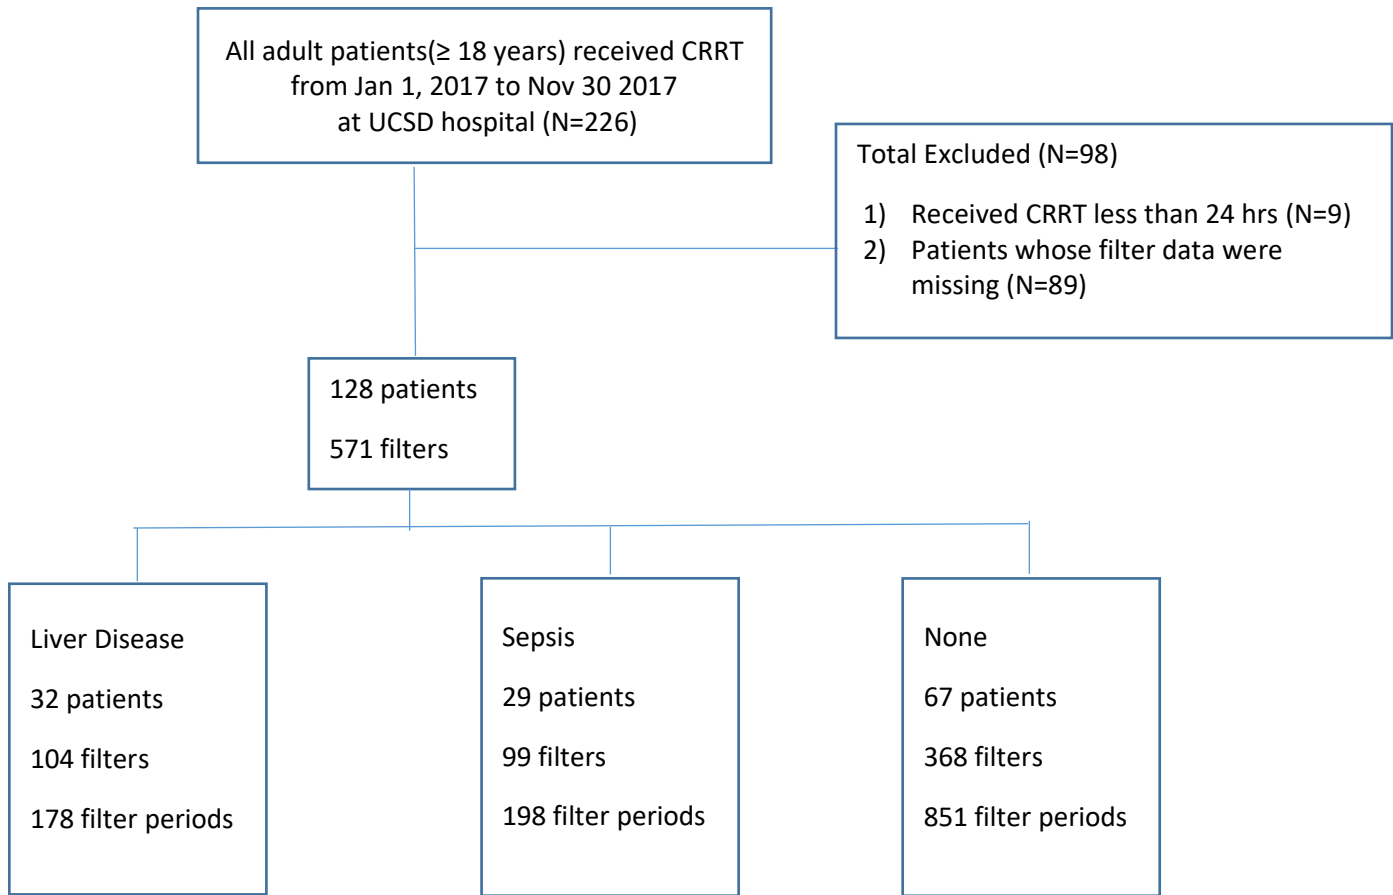

Figure S1. Flow diagrams of included patients

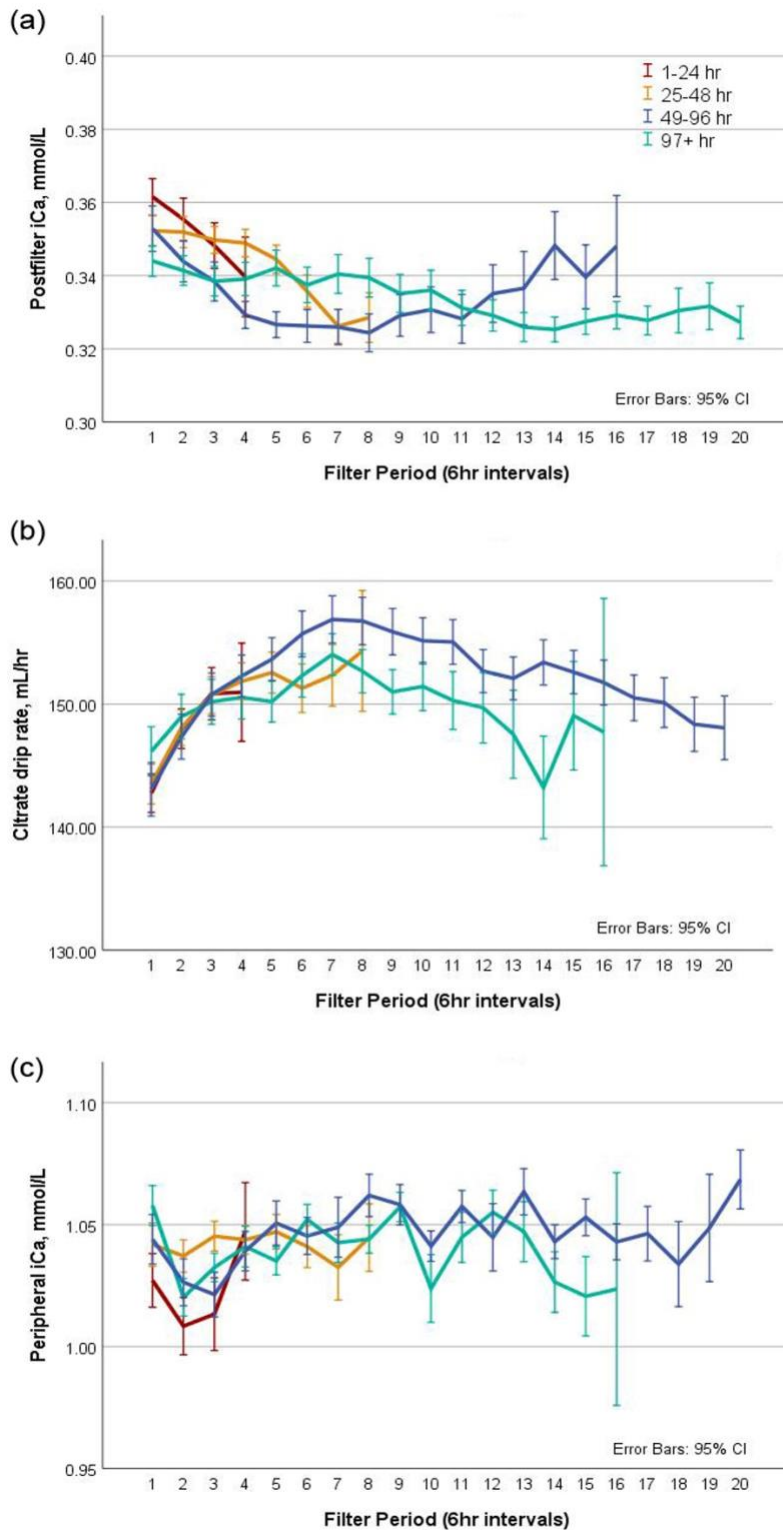

Figure S2. Comparisons of postfilter ionized calcium(a), citrate flow rate(b) and peripheral ionized calcium levels(c) according to filter life group: brown, filter life  $\leq 24$ hr; yellow,  $24 < \text{filter life} \leq 48$ hr; green,  $48 < \text{filter life} \leq 96$ hr; blue, filter life  $> 96$

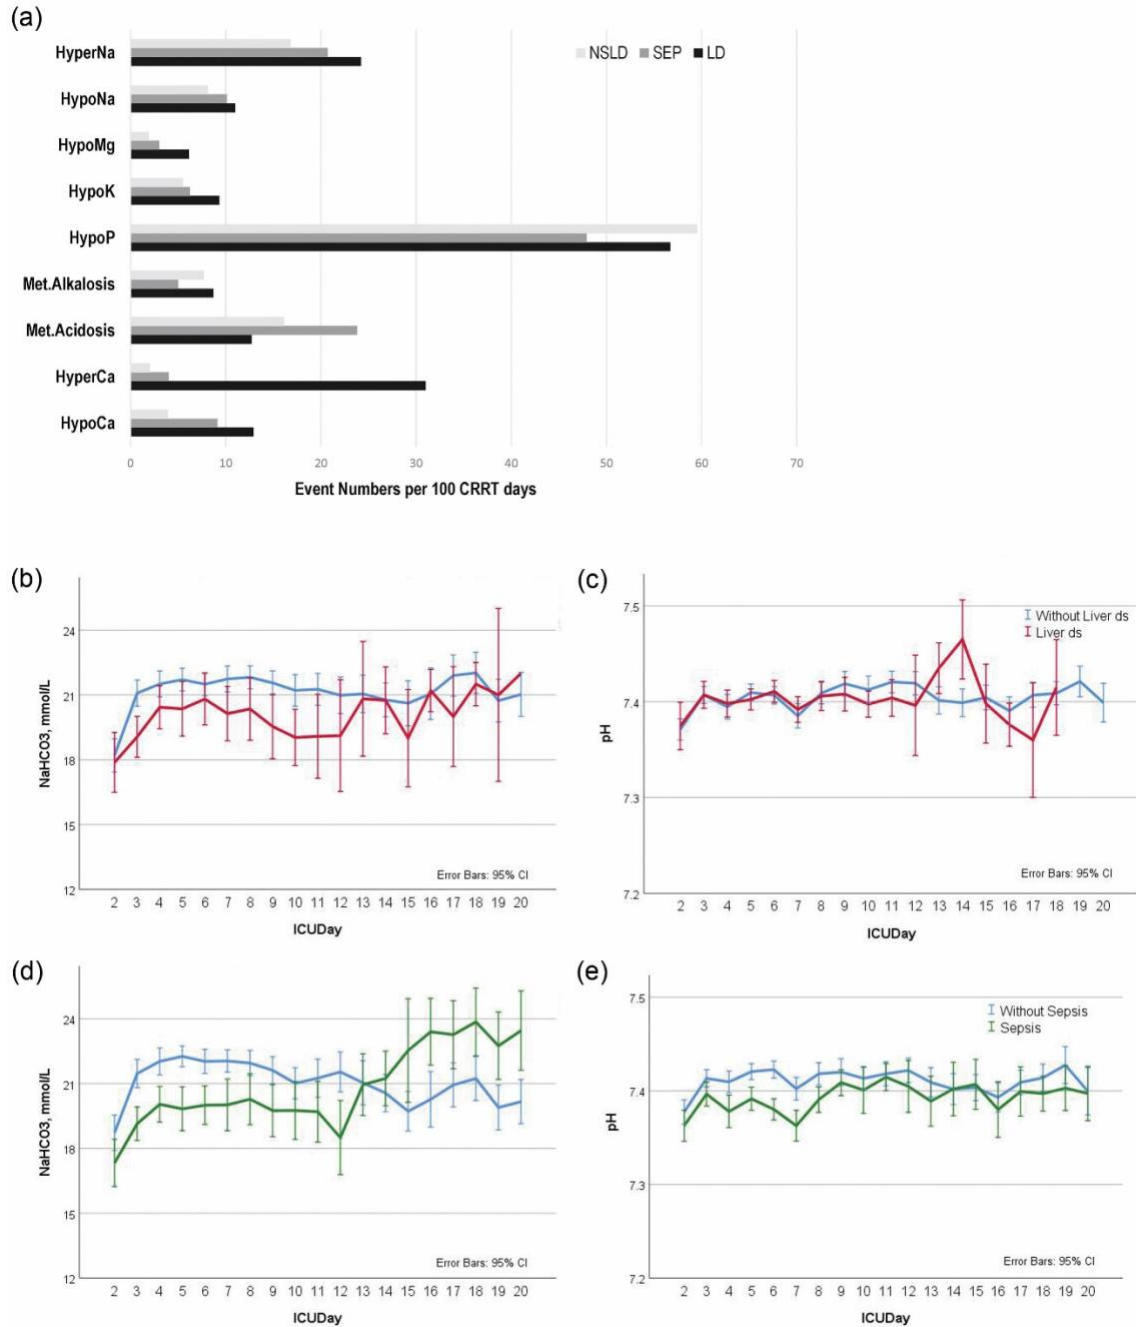

Figure S3. Metabolic complications of RCA with calcium containing solutions (a) Incidence of metabolic complications among the patients with liver disease (LD, black bar), sepsis without liver disease (SEP, gray bar), and without liver disease or sepsis (NSLD, light gray bar) (b) Changes of NaHCO<sub>3</sub> and (c) pH level in patients with liver disease (d) Changes of NaHCO<sub>3</sub> and (e) pH in patients with sepsis; Red line in (b) and (c), patients with liver disease; Blue line in (b) and (c), patients without liver disease; Green line in (d) and (e), patients with sepsis; Blue line in (d) and (e), patients without sepsis

Table S1. UCSD CRRT electrolyte protocol

|                                                                                                                                                                                                                                                                                                                                                                                                                          |
|--------------------------------------------------------------------------------------------------------------------------------------------------------------------------------------------------------------------------------------------------------------------------------------------------------------------------------------------------------------------------------------------------------------------------|
| <b>UCSD CRRT electrolyte protocol</b>                                                                                                                                                                                                                                                                                                                                                                                    |
| <b>Add to Primasate according to K and Mg values</b><br>Potassium chloride to increase the concentration in 1 mEq/L to 4 mEq/L<br>Magnesium sulfate 50 % to increase concentration of Mg in 1 to 2 mEq/L                                                                                                                                                                                                                 |
| <b>Check Mg / K / P every 6 hours and replace as necessary. (For use in critical care areas only).</b>                                                                                                                                                                                                                                                                                                                   |
| <b>Magnesium (Mg)</b><br>If serum Mg < 1 mg/dL, give 2 grams IV over 2 hour x 3 doses (6 grams total).<br>Recheck serum magnesium 1 hr after infusion.                                                                                                                                                                                                                                                                   |
| <b>Potassium (K) (For central access only).</b><br>If serum K <3 mEq/L call MD, then give KCl 20 meq over 1 hr x 4 doses. Maximum total rate not to exceed 20 mEq/hr.<br>Recheck serum K 1 hr after last dose.                                                                                                                                                                                                           |
| <b>Phosphate (P)</b><br>If serum P < 1 mg/dL, give 10 mEq sodium phosphate over 1.5 hrs x 4 doses. Use sodium phosphate 10 mEq/50mL D5W IVPB.<br>Recheck serum phosphate 1 hour after last infusion.<br>If serum P <3 mg/dL, give sodium phosphate 10 meq/50 ml x 2 doses.<br>If serum P <2.5 mg/dL, give sodium phosphate 10 meq/50 ml x 3 doses.<br>If serum P <2 mg/dL, give sodium phosphate 10 meq/50 ml x 4 doses. |

Table S2. Cutoff values of electrolyte used in metabolic complication measurement

| (a)                         | Low   | Target    | High  |
|-----------------------------|-------|-----------|-------|
| pH                          | <7.30 | 7.35~7.45 | ≥7.50 |
| NaHCO <sub>3</sub> , mmol/L | <22.0 | 22.0~30.0 | ≥30   |
| Ionized calcium, mmol/L     | <0.85 | 0.85~1.05 |       |
| Total calcium, mg/dL        |       | 8.5~10.6  | ≥10.6 |
| Sodium, mmol/L              | <136  | 136~145   | ≥145  |
| Potassium, mmol/L           | <3.5  | 3.5~5.1   | ≥5.1  |
| Magnesium, mg/dL            | <1.6  | 1.6~2.4   | ≥2.4  |
| Phosphate, mg/dL            | <2.7  | 2.7~4.5   | ≥4.5  |

  

| (b)                     | Mild                 | Moderate           | Severe |
|-------------------------|----------------------|--------------------|--------|
| Hypocalcemia, mmol/L    | -                    | 0.80 ≤ iCa < 0.85  | < 0.80 |
| Hypercalcemia, mg/dL    | 10.6 ≤ Total Ca < 14 | 12 ≤ Total Ca < 14 | ≥ 14   |
| Metabolic acidosis, pH  | 7.25 ≤ pH < 7.30     | 7.20 ≤ pH < 7.25   | < 7.20 |
| Metabolic alkalosis, pH | 7.50 ≤ pH < 7.55     | 7.55 ≤ pH < 7.60   | ≥ 7.60 |
| Hypophosphatemia, mg/dL | 2.0 ≤ P < 2.7        | 1.0 ≤ P < 2.0      | < 1.0  |
| Hypokalemia, mmol/L     | 3.0 ≤ K < 3.5        | 2.5 ≤ K < 3.0      | < 2.5  |
| Hypomagnesemia, mg/dL   | -                    | 1.0 ≤ Mg < 1.6     | < 1.0  |
| Hyponatremia, mmol/L    | 130 ≤ Na < 136       | 125 ≤ Na < 130     | < 125  |
| Hypernatremia, mmol/L   | 145 ≤ Na < 152       | 152 ≤ Na < 160     | ≥ 160  |

Abbreviations: iCa, ionized calcium; Total ca, serum total calcium; P, phosphate; K, potassium; Na, sodium. We did not categorize mild hypocalcemia and hypomagnesemia because target values were kept below the lower cut off the normal range in some patients.

Table S3. Acute on chronic liver failure grade at CRRT initiation

|                                              |           |
|----------------------------------------------|-----------|
| Single organ dysfunction score (median, IQR) |           |
| Liver                                        | 2(1-3)    |
| Kidney                                       | 3(3-3)    |
| Brain                                        | 3(1-3)    |
| Coagulation                                  | 2.5(1-3)  |
| Circulatory                                  | 2.5(2-3)  |
| Respiratory                                  | 1(1-1)    |
| Total number failure                         | 3(2-4)    |
| CLIF organ failure score                     | 13(11-15) |
| ACLF grade (n, %)                            |           |
| Grade 1                                      | 4(12.5)   |
| Grade 2                                      | 5(15.6)   |
| Grade 3                                      | 23(71.9)  |

Table S4. Replacement solutions used in the CRRT circuit.

| Variables                                                 |             |
|-----------------------------------------------------------|-------------|
| No. filter hour 28,671                                    |             |
| Pre-filter Replacement flow rate, ml/hr                   | 483.1±35.1  |
| Pre-filter Replacement solutions <sup>‡</sup>             |             |
| 0.9% saline                                               | 39.1%       |
| 0.45% saline                                              | 48.4%       |
| Sterile water +150mEq/L of NaHCO <sub>3</sub>             | 1.5%        |
| 0.45% saline + 75mEq/L of NaHCO <sub>3</sub>              | 0.5%        |
| Not described                                             | 10.4%       |
| Post-filter fluid for deaeration chamber flow rate, mL/hr | 196.4±34.9  |
| Post-filter solutions for deaeration chamber <sup>‡</sup> |             |
| 0.9% saline                                               | 46.2%       |
| 0.45% saline                                              | 39.7%       |
| 0.45% saline + 75mEq/L of NaHCO <sub>3</sub>              | 10.5%       |
| Sterile water +150mEq/L of NaHCO <sub>3</sub>             | 3.3%        |
| Not described                                             | 0.4%        |
| Intravenous substitution flow rate, ml/hr                 | 622.2±167.6 |
| Intravenous substitution solutions <sup>‡</sup>           |             |
| 0.9% saline                                               | 48.4%       |
| Prismasol                                                 | 41.6%       |
| Individualized NaHCO <sub>3</sub> based solution*         | 7.3%        |
| 0.45% saline                                              | 0.4%        |
| Not described                                             | 2.3%        |

‡ % application of solution was calculated per 28,671 filter hours, \*includes sterile water+150mEq/L of NaHCO<sub>3</sub>, sterile water+75mEq/L of NaHCO<sub>3</sub>, half saline+ 75 mEq/L of NaHCO<sub>3</sub>

Table S5. Filter changing reasons according to the filter life group in patients with liver disease or sepsis

| (a) LD                                      | Filter Life Group |             |             |           | Total     |
|---------------------------------------------|-------------------|-------------|-------------|-----------|-----------|
|                                             | 1<br>≤ 24h        | 2<br>25-48h | 3<br>49-96h | 4<br>>96h |           |
| Total number of filters                     | 45                | 31          | 16          | 12        | 104       |
| Not recorded, n                             | 22(48.9%)         | 11(35.5%)   | 7(43.8%)    | 0         | 40(38.5%) |
| Recorded, n                                 | 23(51.1%)         | 20(64.5%)   | 9(56.3%)    | 12(100%)  | 64(61.5%) |
| Reason to change filters among the recorded |                   |             |             |           |           |
| Unrelated to therapy, n(%)                  | 9(39.1)           | 6(30.0)     | 5(55.6)     | 4(33.3)   | 24(37.5)  |
| Time, n(%)                                  | 0(0)              | 0(0)        | 0(0)        | 8(66.7)   | 8(12.5)   |
| Access, n(%)                                | 1(4.3)            | 0(0)        | 0(0)        | 0(0)      | 1(1.6)    |
| Clotting, n(%)                              | 11(47.9)          | 10(50.0)    | 4(44.4)     | 0(0)      | 25(39.1)  |
| Low efficacy, n(%)                          | 2(8.7)            | 4(20.0)     | 0(0)        | 0(0)      | 6(9.3)    |

  

| (b) SEP                                     | Filter Life Group |                    |                   |                  | (n=99)<br>Total |
|---------------------------------------------|-------------------|--------------------|-------------------|------------------|-----------------|
|                                             | 1 (n=49)<br>≤ 24h | 2 (n=27)<br>25-48h | 3 (n=7)<br>49-96h | 4 (n=16)<br>>96h |                 |
| Not recorded, n                             | 19(38.8%)         | 13(48.1%)          | 1(14.3%)          | 0                | 33(33.3%)       |
| Recorded, n                                 | 30(61.2%)         | 14(51.9%)          | 6(85.7%)          | 16(100%)         | 66(66.7%)       |
| Reason to change filters among the recorded |                   |                    |                   |                  |                 |
| Unrelated to therapy, n(%)                  | 18(60.0)          | 7(50.0)            | 3(50.0)           | 3(18.8)          | 31(47.0)        |
| Time, n(%)                                  | 0(0)              | 0(0)               | 0(0)              | 9(56.3)          | 9(13.6)         |
| Access, n(%)                                | 3(10.0)           | 1(7.1)             | 1(16.7)           | 2(12.5)          | 7(10.6)         |
| Clotting, n(%)                              | 8(26.7)           | 5(35.8)            | 1(16.7)           | 1(6.3)           | 15(22.7)        |
| Low efficacy, n(%)                          | 1(3.3)            | 1(7.1)             | 1(16.7)           | 1(6.3)           | 4(6.0)          |

Abbreviations: LD, filters with liver disease; SEP, filters with sepsis in the absence of liver disease



Table S6. Comparisons of new onset metabolic complications among different disease groups in patients with RCA-CRRT

|                     | All   | LD    |      |      | SEP  | NSLD | P    |        |
|---------------------|-------|-------|------|------|------|------|------|--------|
|                     |       | G 1   | G 2  | G3   |      |      |      |        |
| Total CRRT days     | 1,227 | 178   | 17   | 27   | 134  | 198  | 851  |        |
| Hypocalcemia        | 6.0   | 12.9* | 5.9  | 11.1 | 14.1 | 9.1* | 3.9  | 0.004  |
| Moderate            | 2.7   | 4.5   | 0    | 7.4  | 4.4  | 3.0  | 2.2  |        |
| Severe              | 3.3   | 8.4   | 5.9  | 3.7  | 9.6  | 6.1  | 1.6  |        |
| Hypercalcemia       | 6.7   | 31.0* | 31.6 | 0    | 36.6 | 4.0  | 2.0  | <0.001 |
| Mild                | 5.0   | 23.0  | 31.6 | 0    | 26.1 | 3.0  | 1.5  |        |
| Moderate            | 0.7   | 3.2   | 0    | 0    | 4.2  | 0.5  | 0.2  |        |
| Severe              | 1.0   | 4.8   | 0    | 0    | 6.3  | 0.5  | 0.2  |        |
| Hypophosphatemia    | 57.1  | 56.7  | 57.9 | 66.7 | 54.2 | 47.0 | 59.5 | 0.364  |
| Mild                | 35.4  | 35.3  | 47.4 | 29.6 | 34.5 | 30.2 | 36.7 |        |
| Moderate            | 21.1  | 20.3  | 10.5 | 33.3 | 19.0 | 16.3 | 22.5 |        |
| Severe              | 0.5   | 1.1   | 0    | 3.7  | 0.7  | 0.5  | 0.4  |        |
| Metabolic acidosis  | 16.9  | 12.7* | 15.2 | 5.2  | 15.9 | 23.8 | 16.1 | 0.042  |
| Mild                | 8.1   | 6.4   | 7.7  | 0    | 7.7  | 9.9  | 8.1  |        |
| Moderate            | 3.9   | 1.7   | 0    | 3.7  | 3.7  | 5.0  | 4.0  |        |
| Severe              | 4.9   | 4.6   | 7.5  | 1.5  | 4.5  | 8.9  | 4.0  |        |
| Metabolic alkalosis | 7.2   | 8.7   | 15.6 | 1.5  | 0    | 5.0  | 7.7  | 0.685  |
| Mild                | 5.8   | 7.5   | 0    | 0    | 0    | 4.0  | 6.0  |        |
| Moderate            | 0.7   | 1.2   | 7.4  | 0    | 0    | 1.0  | 0.6  |        |
| Severe              | 0.7   | 0     | 8.2  | 1.5  | 0    | 0    | 1.1  |        |
| Hypomagnesemia      | 2.7   | 6.4   | 0    | 3.7  | 7.7  | 3.0  | 1.9  | 0.264  |
| Moderate            | 2.7   | 6.4   | 0    | 3.7  | 7.7  | 3.0  | 1.9  |        |
| Severe              | 0     | 0     | 0    | 0    | 0    | 0    | 0    |        |
| Hypokalemia         | 6.2   | 9.3   | 23.1 | 0    | 8.8  | 6.2  | 5.5  | 0.317  |
| Mild                | 5.7   | 7.6   | 15.4 | 0    | 7.7  | 6.2  | 5.1  |        |
| Moderate            | 0.6   | 1.7   | 7.7  | 0    | 1.1  | 0    | 0.4  |        |
| Severe              | 0     | 0     | 0    | 0    | 0    | 0    | 0    |        |
| Hyponatremia        | 8.4   | 11.4  | 32.7 | 6.1  | 9.3  | 10.7 | 7.0  | 0.649  |
| Mild                | 7.3   | 10.0  | 28.5 | 6.1  | 8.1  | 10.7 | 5.8  |        |
| Moderate            | 0.5   | 0.9   | 0    | 0    | 1.2  | 0    | 0.5  |        |
| Severe              | 0.6   | 0.5   | 4.2  | 0    | 0    | 0    | 0.7  |        |
| Hypernatremia       | 18.6  | 24.6  | 15.8 | 40.7 | 22.5 | 20.3 | 16.8 | 0.773  |
| Mild                | 17.8  | 23.5  | 15.8 | 37.0 | 21.8 | 19.3 | 16.1 |        |
| Moderate            | 0.7   | 1.1   | 0    | 3.7  | 0.7  | 1.0  | 0.6  |        |
| Severe              | 0.1   | 0     | 0    | 0    | 0    | 0    | 0.1  |        |

Abbreviations: RCA, regional citrate anticoagulation; CRRT, continuous renal replacement therapy; LD, cases with liver disease; SEP, cases with sepsis in the absence of liver disease; NSLD, cases without sepsis or liver disease. Foot note: \*p<0.05 compared to the NSLD, P-value was calculated based on the Generalized linear mixed effects model.

Table S7. Incidence of citrate accumulation according to patient condition

| ACLF grade                                                       | Total    | LD       |         |         | SEP     | NSLD   | P      |        |
|------------------------------------------------------------------|----------|----------|---------|---------|---------|--------|--------|--------|
|                                                                  |          | G1       | G2      | G3      |         |        |        |        |
| Number of patients                                               | 128      | 32       | 4       | 5       | 23      | 29     | 67     |        |
| Calcium Ratio $\geq 2.5$ , n(%)                                  | 17(13.3) | 11(34.4) | 1(25.0) | 1(20.0) | 9(39.1) | 2(6.9) | 4(6.0) | <0.001 |
| Calcium Ratio $\geq 2.5$ and pH <7.3, n(%)                       | 8(6.3)   | 5(15.6)  | 0       | 1(20.0) | 4(17.4) | 1(3.4) | 2(2.9) | 0.005  |
| Calcium Ratio $\geq 2.5$ and NaHCO <sub>3</sub> <20 mmol/L, n(%) | 5(3.9)   | 3(9.4)   | 0       | 0       | 3(13.0) | 1(3.4) | 1(1.5) | 0.165  |

Abbreviations; LD, patients with liver disease; SEP, patients with sepsis in the absence of liver disease; NSLD, patients without sepsis or liver disease

Table S8. Factors associated with ICU mortality

|                                    | HR    | 95% CI      | P-value |
|------------------------------------|-------|-------------|---------|
| Age, yr                            | 1.014 | 0.986-1.043 | 0.30    |
| Sex (Male)                         | 1.210 | 0.508-2.883 | 0.74    |
| Body mass index, kg/m <sup>3</sup> | 0.986 | 0.933-1.043 | 0.64    |
| Sepsis (Yes)                       | 1.393 | 0.606-3.201 | 0.20    |
| Liver disease (Yes)                | 1.495 | 0.548-4.084 | 0.83    |
| Citrate accumulation* (Yes)        | 0.685 | 0.256-1.828 | 0.47    |
| SOFA score at CRRT start           | 1.233 | 1.072-1.419 | 0.003   |

Abbreviations: SOFA, sequential organ failure assessment; CRRT, continuous renal replacement therapy. Foot note:

\*Estimation of citrate accumulation, calcium ratio  $\geq 2.5$
